# Supplementary material for: The use of micro-costing in economic analyses of surgical interventions: a systematic review
Source: Springer Nature journal article supplement (doi:10.1186/s13561-020-0260-8), 2020-01-29
Supplement: MOESM2 [file 17607304]

# Screening log (Phase 1 and 2)

Record ID \_\_\_\_\_

## Screening Items Phase 1 (abstract)

Reviewer name

- Charlotte Davies  
 Gareth Davies  
 Shelley Potter

Endnote ID (author surname, year, #number) \_\_\_\_\_

Original research article  Yes  No  Unclear

Full length article  Yes  No

If not full text, what type of publication?

Abstract only  
 Systematic or narrative review  
 Letter  
 Editorial  
 Study protocol  
 Other

Surgical procedure(s)/intervention  Yes  No  Not clear

Economic evaluation or cost analysis  Yes  No  Not clear

Applied micro-costing  Yes  No  Not clear

All Phase 1 screening criteria met for full text review  Yes  No  Not clear

If Phase 1 not clear - full text review needed  Yes  No

## Screening Items Phase 2 (full text)

Able to access full text article ?  Yes  No  Need inter lib loan

Have the full text article?  Yes  No

Is study related to surgery?  Yes  No

Is study related to micro-costing? (not micro-costing if e.g a modeling study, top down study)  Yes  No

---

For the SURGICAL PROCEDURE, does the study represent a sufficiently detailed micro-costing exercise? (i.e. is at least one component of the procedure microcosted?) Defined by definitions A and B below)

Yes  No  Not sure

A. Are the elements of a surgical procedure sufficiently disaggregated and costs of each item presented separately (i.e. at the very least TWO separate elements of PROCEDURE costs presented separately e.g. personnel costs and consumable costs). (look in results for tables)

B. Have the authors indicated that they have assessed/measured/calculated the unit cost of AT LEAST ONE ELEMENT of procedure

---

Include study in final data extraction?

Yes  No  Unsure

---

Reason for uncertainty

---

---

Give reason for exclusion

---
